# Supplementary material
Source: PubMed Central journal article supplement (PMC3195467)
Supplement: JCI57235sd.pdf [file JCI57235sd.pdf]

# Supplemental figures and legends

## Differentiation of Human Macrophages In Vitro With Enhanced Antimycobacterial Activity

Guillaume Vogt<sup>1</sup> & Carl Nathan<sup>1</sup>

Department of Microbiology and Immunology, Weill Cornell Medical College,  
1300 York Avenue, New York, NY 10065, USA

<sup>1</sup>To whom correspondence should be addressed at Guillaume Vogt, St. Giles Laboratory of Human Genetics of Infectious Diseases, Box 163, The Rockefeller University, 1230 York Avenue, New York, NY 10065. Tel: 212 327-7336 Fax: 212 327 7330. email [guillaume.vogt@inserm.fr](mailto:guillaume.vogt@inserm.fr); Carl Nathan, Department of Microbiology and Immunology, Weill Cornell Medical College, 1300 York Avenue, New York, NY 10065, USA. Tel: 212 746 6505. Fax: 212746 8587. e-mail [cnathan@med.cornell.edu](mailto:cnathan@med.cornell.edu)

Supplemental Figure 1

A

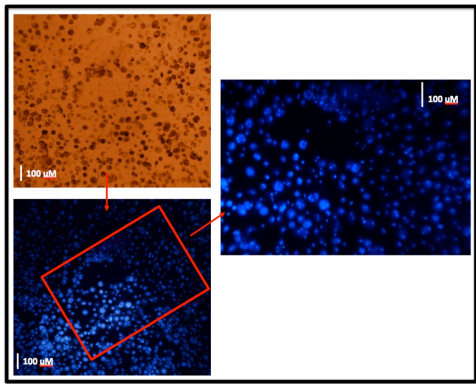

B

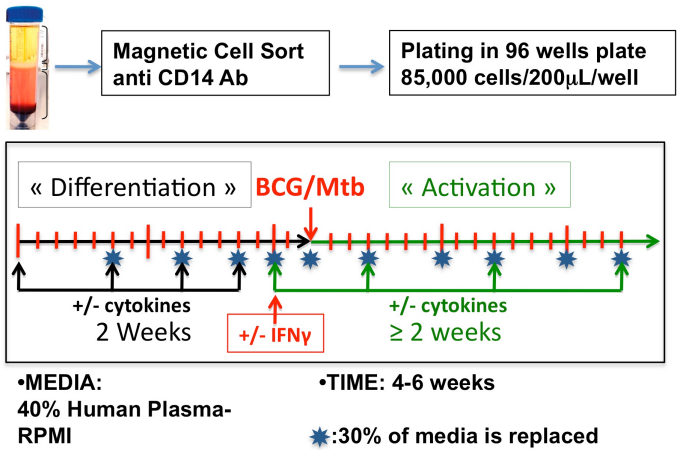

C

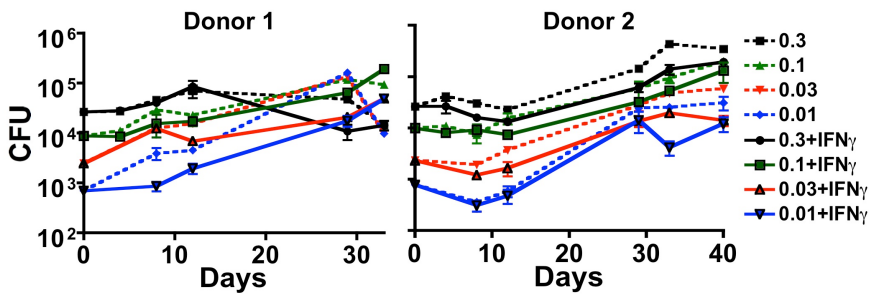

D

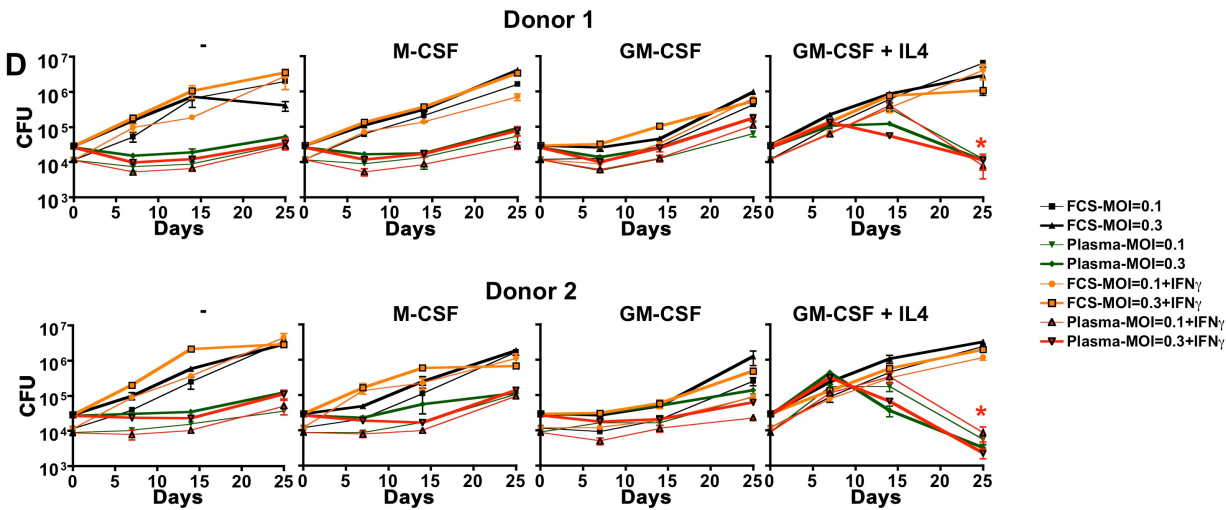

**Supplemental Figure 1. Impact of the MOI, and GM-CSF, M-CSF and IL-4 during the differentiation period on MDM control of BCG.** (A) *Morphology of multinucleated giant cells.* MDM were differentiated with RPMI-40% human plasma (no added cytokines) for 14 days and micrographs were taken. Top panel, differential interference contrast. Other panels, nuclear staining with DAPI. Scale bar indicates 100  $\mu$ m. (B) *Protocol of differentiation.* Peripheral monocytes purified by CD14 positive beads were differentiated for 14 days with or without exogenous cytokines under various tensions of O<sub>2</sub>. Cells were activated with the indicated cytokines on day 14 (and others indicated days) and infected with BCG or *M. tuberculosis* on day 16. Cells were lysed 2-8 weeks later to determine CFU. Blue stars represent changes of 30% of the medium. (C) *Effect of MOI on CFU.* MDM differentiated with RPMI-40% human plasma (no added cytokines) for 14 days were treated or not on day 14 with IFN $\gamma$  and infected with BCG at the indicated MOIs on day 16. Cells were lysed for CFU determination at the days following infection indicated on the X axis. Results from 2 donors are presented. (D) *Effect of cytokines during the differentiation period.* MDM were differentiated for 14 days as in (C) except that where indicated they were exposed to M-CSF, GM-CSF or the combination of GM-CSF + IL4. Each cytokine was at 50 ng/mL. On day 14, MDM were treated or not with IFN $\gamma$  infected with BCG at the indicated MOIs on day 16. Cells were lysed for CFU determination at the days following infection indicated on the X axis. The red “\*” refers to visual cell destruction. Results from 2 donors are presented.

Supplemental Figure 2

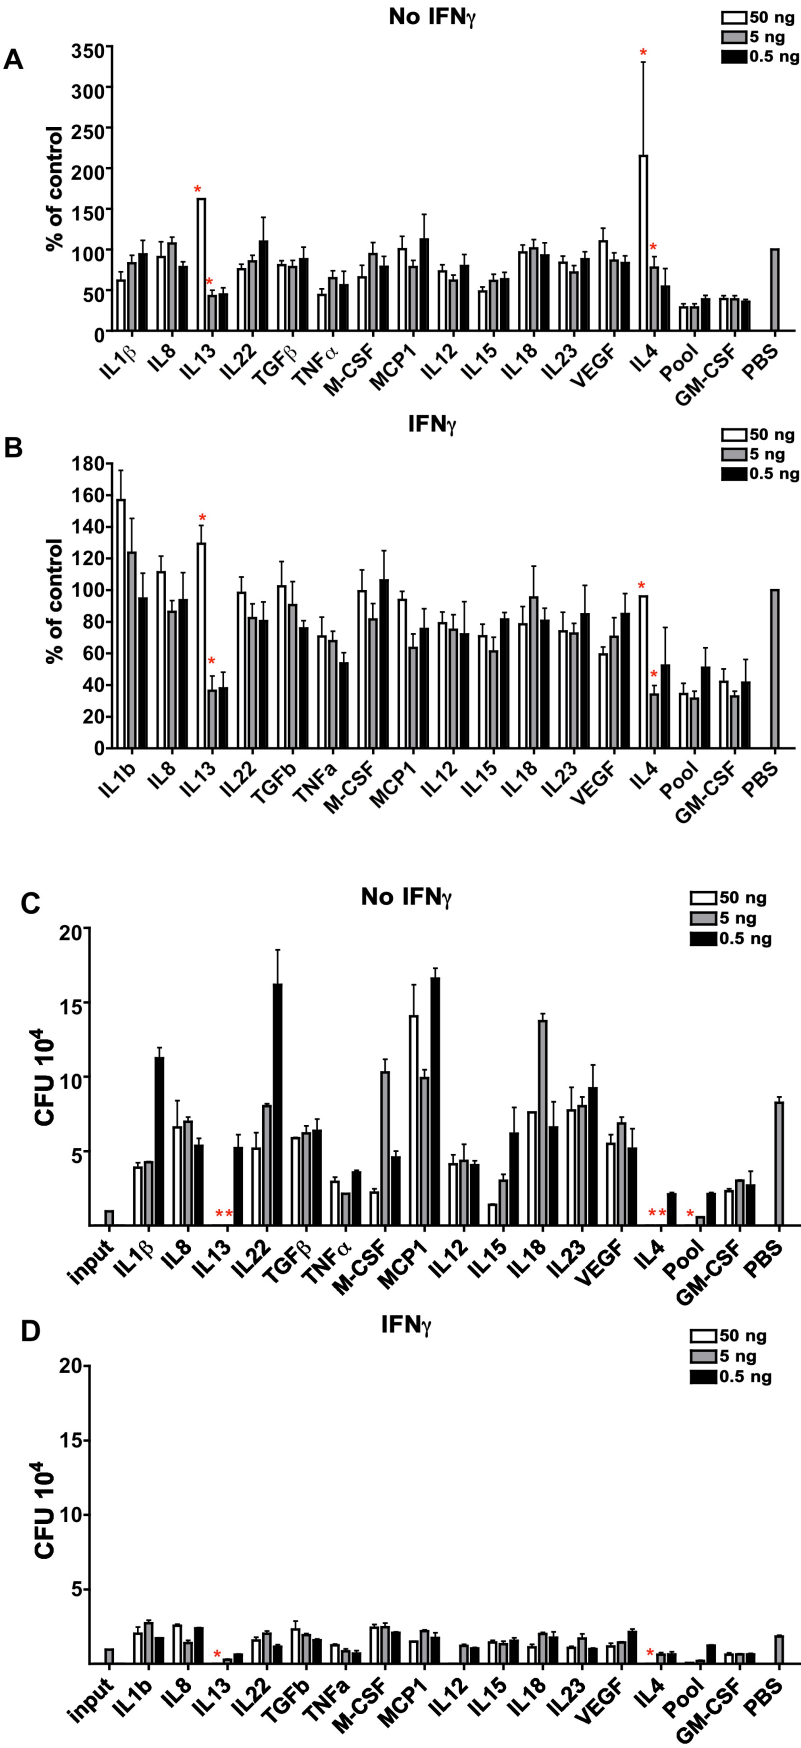

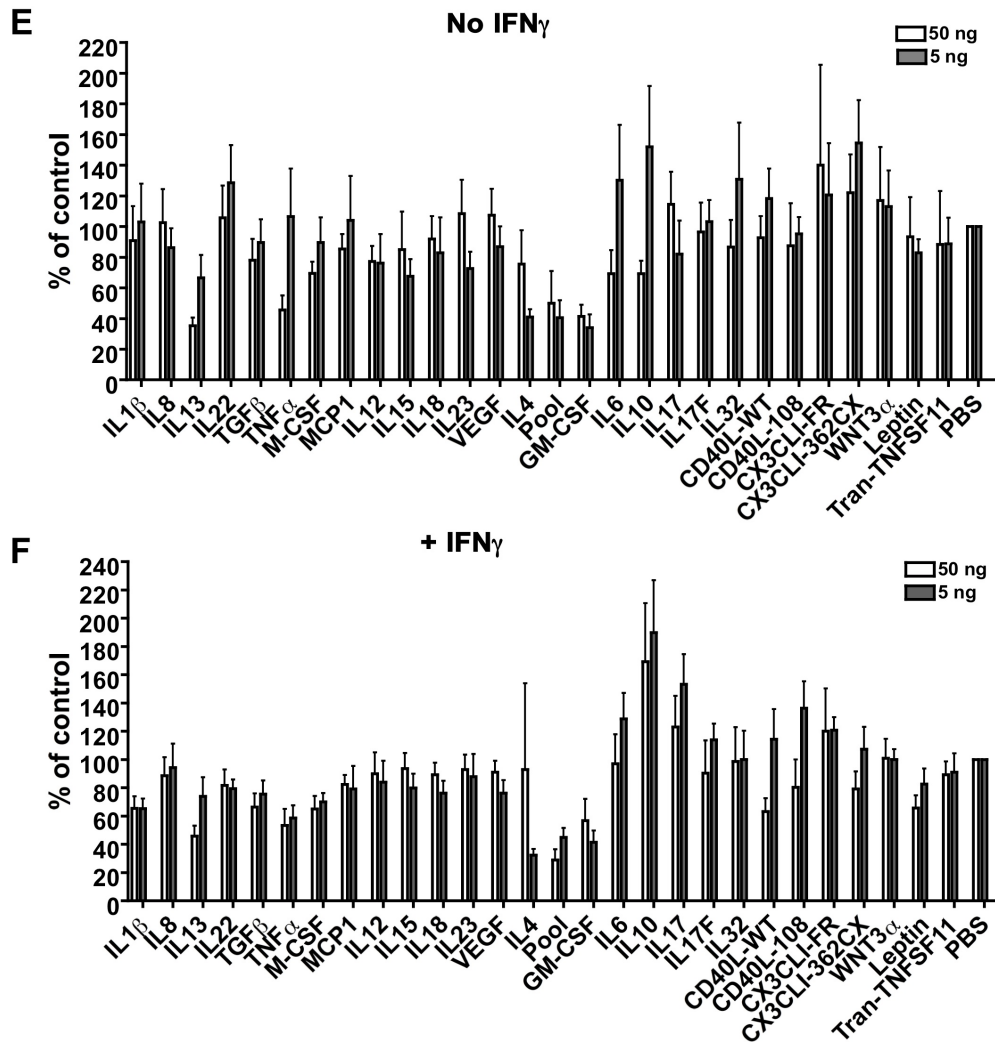

**Supplemental Figure 2. Role of IFN $\gamma$  and cytokines in the activation phase for the control and killing of BCG by MDM (A) and (B) Role of cytokines in the activation phase** MDM were differentiated for 14 days with human plasma-RPMI. On day 14, MDM were treated (B) or not (A) with IFN $\gamma$  (2.5 ng/mL) alone or with the other cytokines at the indicated concentrations. On day 16, MDM were infected *M. tuberculosis* (MOI = 0.1). Cells were lysed 3 weeks later to determine CFU. (C) and (D) MDM differentiated with human plasma-RPMI (no added cytokines) for 14 days were treated or not on day 14 without (A) and (E) or with (B) and (F) IFN $\gamma$ . Additionally, cells were activated with various concentrations of the indicated cytokines on day 14 and infected with BCG (MOI = 0.1) on day 16. Cells were lysed 3 weeks later to determine CFU. Percentage of control of BCG growth compared to MDM receiving PBS instead of cytokines. The red “\*” refers to visual cell destruction. These experiments are representative of five independent experiments from two donors.

### Supplemental Figure 3

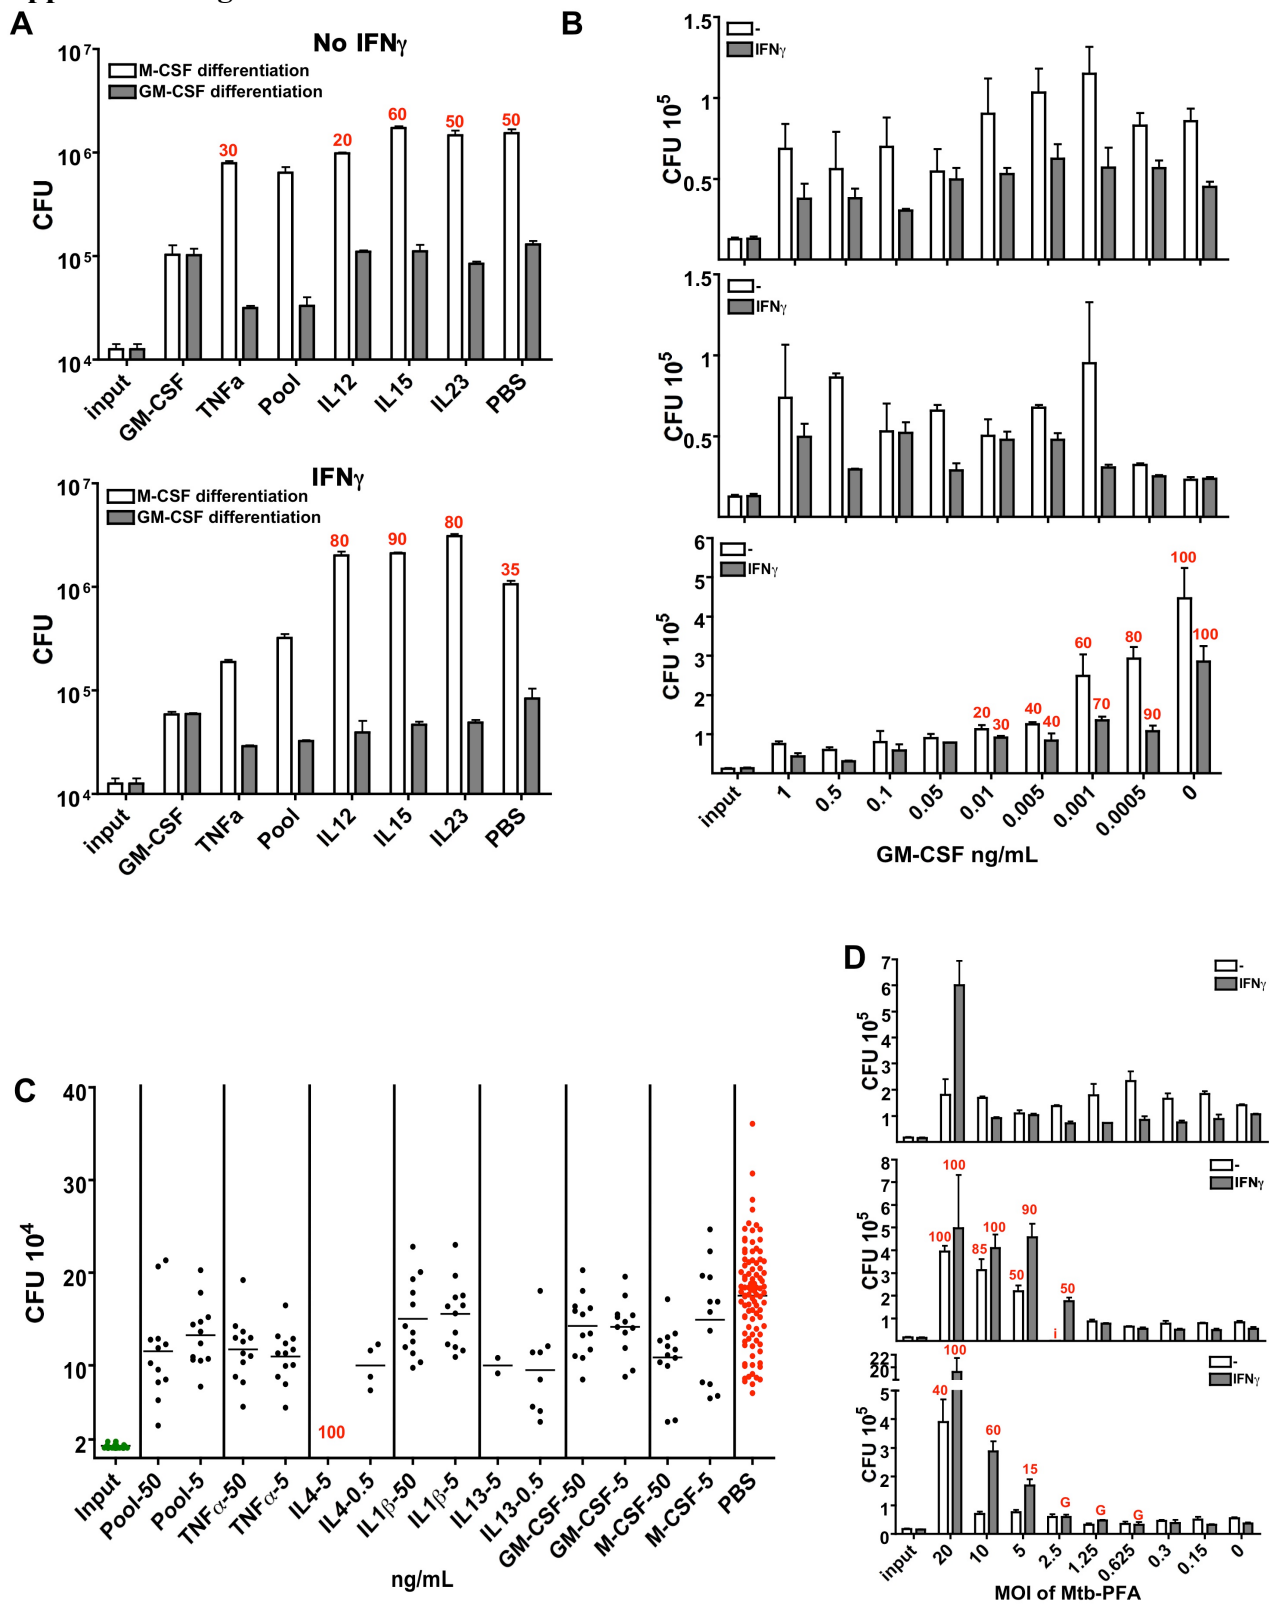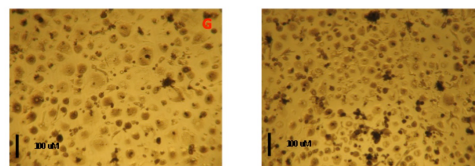

## Supplemental Figure 3

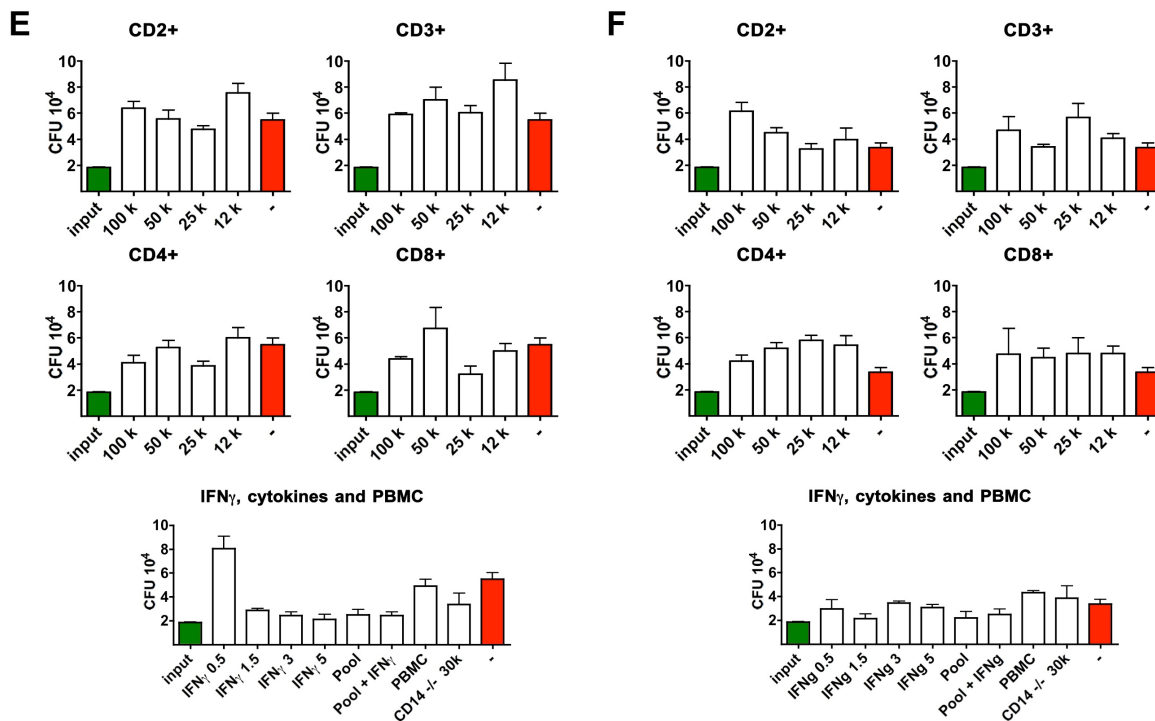

**Supplemental Figure 3. MDM control of *M. tuberculosis*: Role of cytokines and PFA-fixed (killed) *M. tuberculosis* in the activation period and GM-CSF versus M-CSF during the differentiation period. (A) Negative effect of M-CSF versus GM-CSF during the differentiation period. MDM were differentiated for 14 days with human plasma-RPMI and exposed to M-CSF or GM-CSF (each cytokine was at 50 ng/mL) in 10% O<sub>2</sub>. On day 14, MDM were treated without (upper panel) or with (lower panel) IFN $\gamma$  (2.5 ng/mL) alone or with the other cytokines indicated. On day 16, MDM were infected with *M. tuberculosis* (MOI = 0.1). Cells were lysed for CFU determination at two weeks. Results were similar with cells from 4 donors (B) Optimal concentration of GM-CSF during the differentiation period. MDM were differentiated for 14 days as in (A) except that where indicated, on the X axis, they were exposed different amount of GM-CSF (from 1 to 0 ng/mL). On day 14, MDM were treated with or without IFN $\gamma$  (2.5 ng/mL). On day 16, MDM were infected with *M. tuberculosis* (MOI = 0.1). Cells were lysed for**

CFU determination at two weeks. Results are represented for 3 donors (upper, middle and lower panels).

**(C) Role of cytokines in the activation phase.** MDM from three donors (each tested twice in independent experiments) were differentiated for 14 days with GM-CSF (0.5 ng/mL) with human plasma-RPMI in 10% O<sub>2</sub>. On day 14, MDM were treated with IFN $\gamma$  (2.5 ng/mL) alone or with the other cytokines indicated. On day 16, MDM were infected with *M. tuberculosis* (MOI = 0.1). Cells were lysed 2 weeks later to determine CFU.

**(D) Effect of PFA-fixed *M. tuberculosis* during the activation period.** MDM from 3 donors were differentiated for 14 days as in (c). On day 14, MDM were treated with or without IFN $\gamma$  (2.5 ng/mL) alone or with various MOI of *M. tuberculosis* fixed by paraformaldehyde as indicated on the X axis. On day 16, MDM were infected *M. tuberculosis* (MOI = 0.1). Cells were lysed 2 weeks later to determine CFU. The red “G” refers to giant cells observed as illustrated in the micrographs in Fig. S3 taken 14 days after infection. In **A-D**, red numbers and “i” refer to cell destruction expressed in percent and to infected well, respectively, estimated visually.

**(E) and (F) Effect of coculture with other cell types during the activation period on MDM for the control of *M. tuberculosis*.** MDM from two donors (donor 1 (E) and donor 2 (F)) were differentiated for 14 days with GM-CSF plus TNF- $\alpha$  (0.5 ng/mL each) under 7.5% O<sub>2</sub>. Cells were activated with freshly purified autologous CD2<sup>+</sup>, CD3<sup>+</sup>, CD4<sup>+</sup>, CD8<sup>+</sup>, CD14<sup>-</sup> cells or PBMC at different cell densities (“k” refers to factor 1000) or by IFN $\gamma$  at the indicated concentration on day 14 and infected with *M. tuberculosis* (MOI = 0.1) on day 16. Cells were lysed 2 weeks later to determine CFU.

A

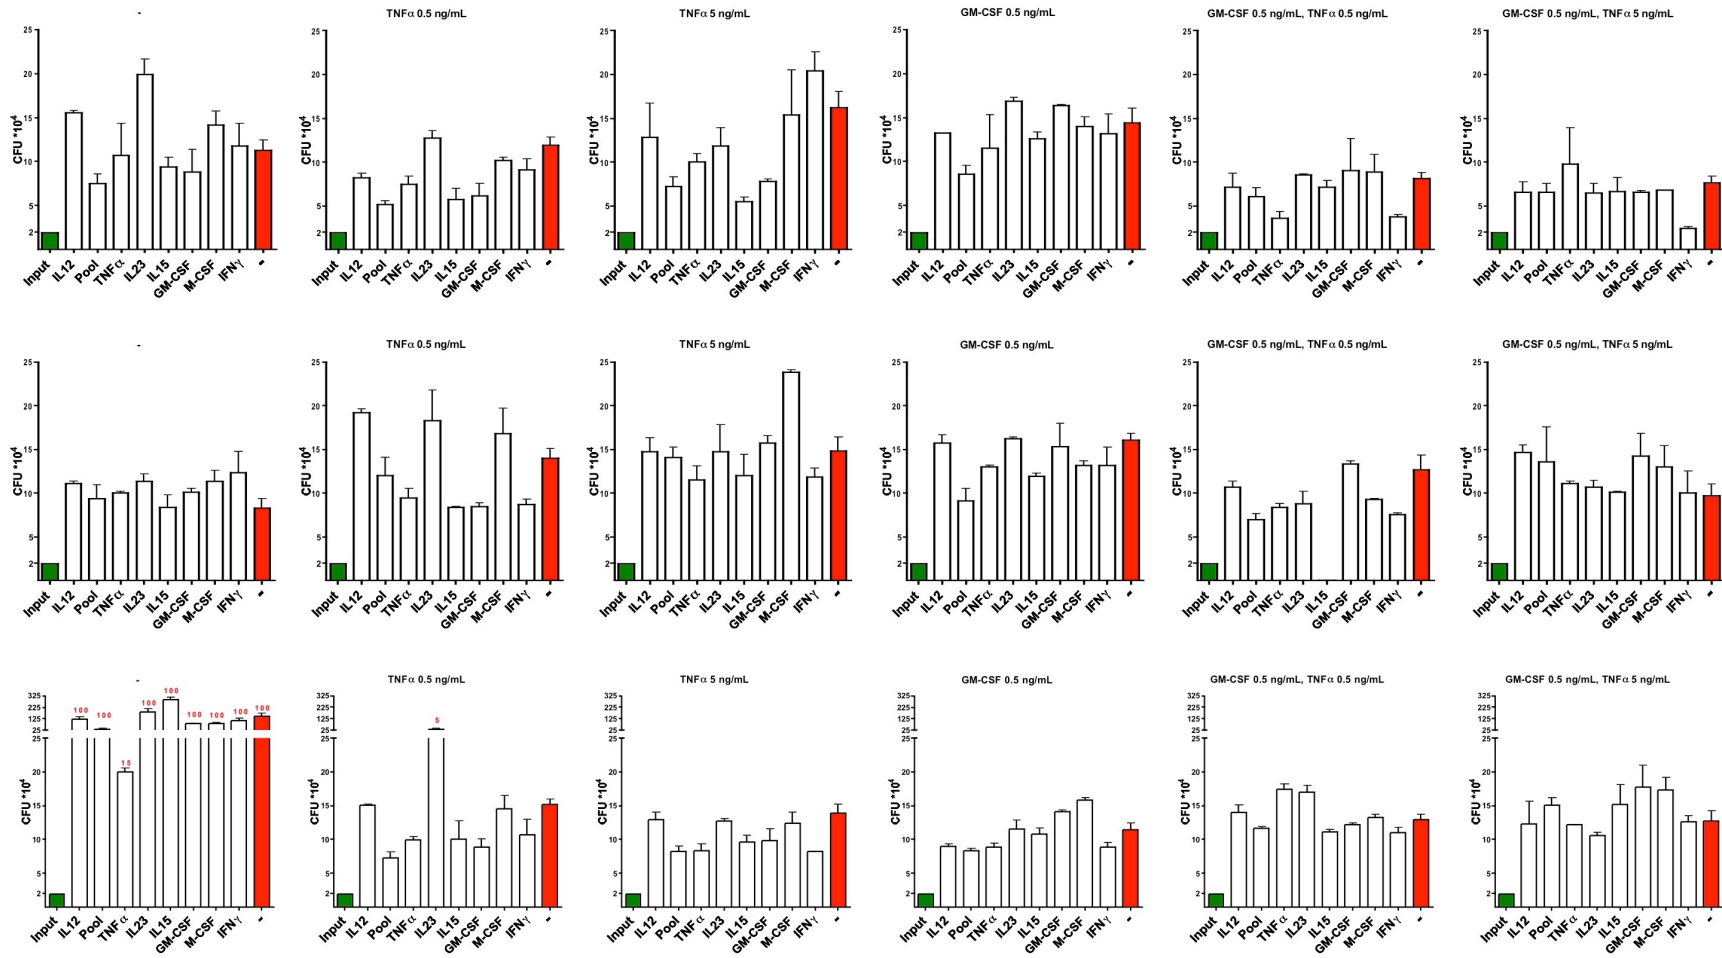

B

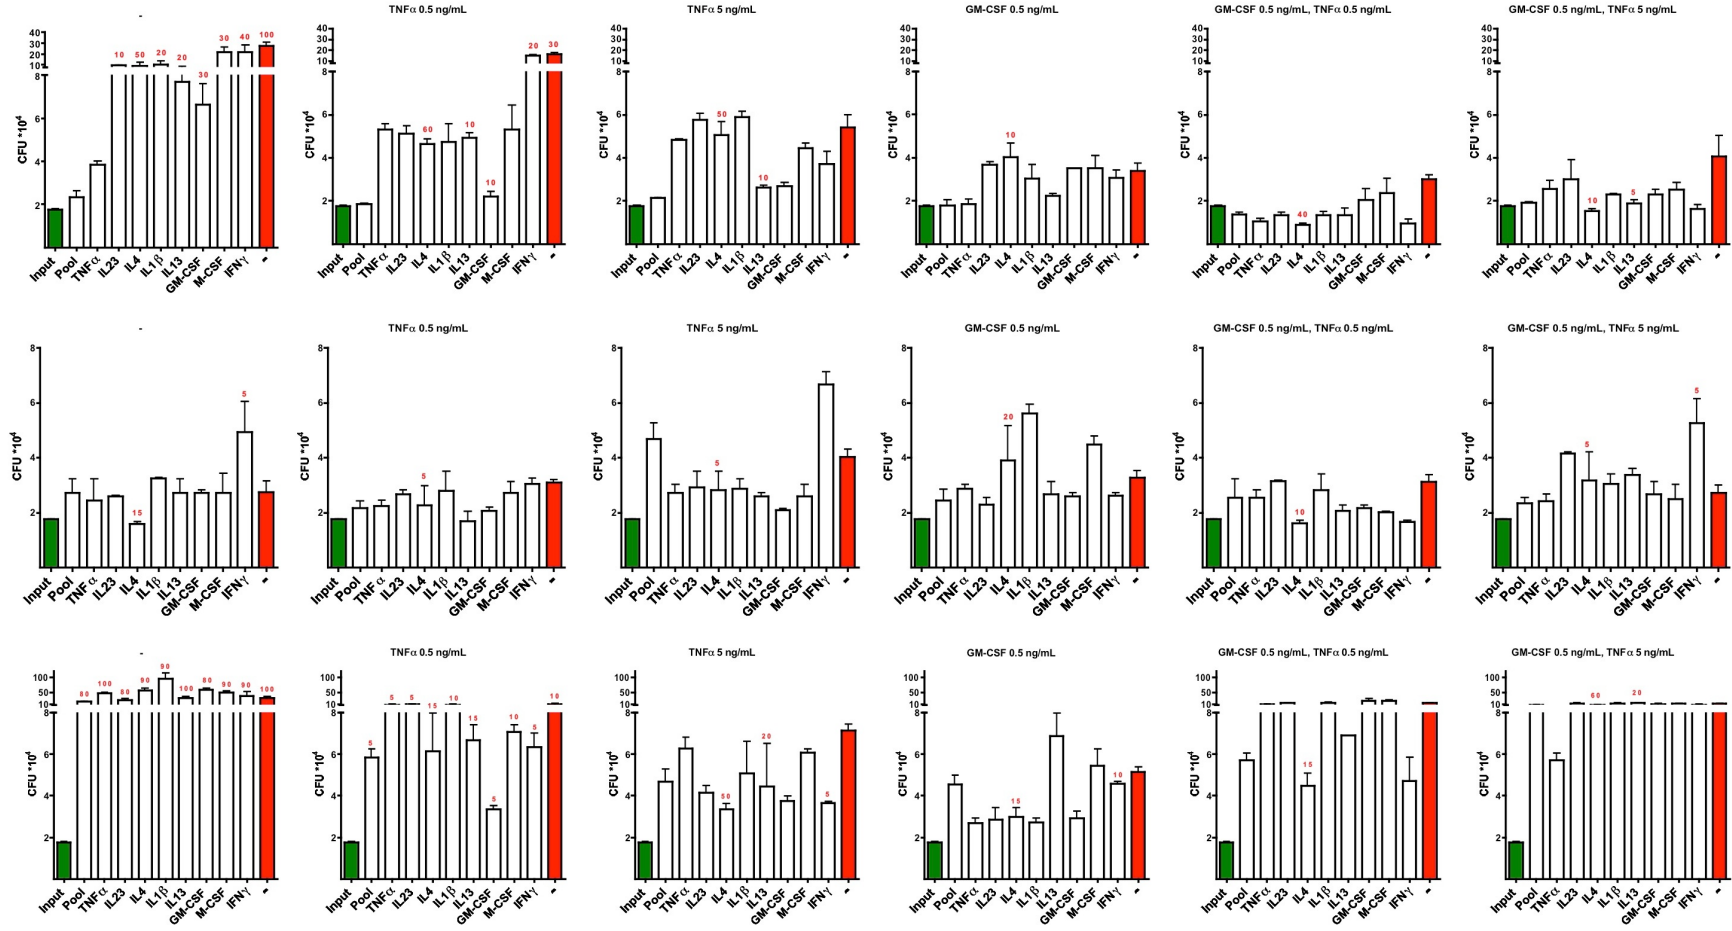

Supplemental Figure 4

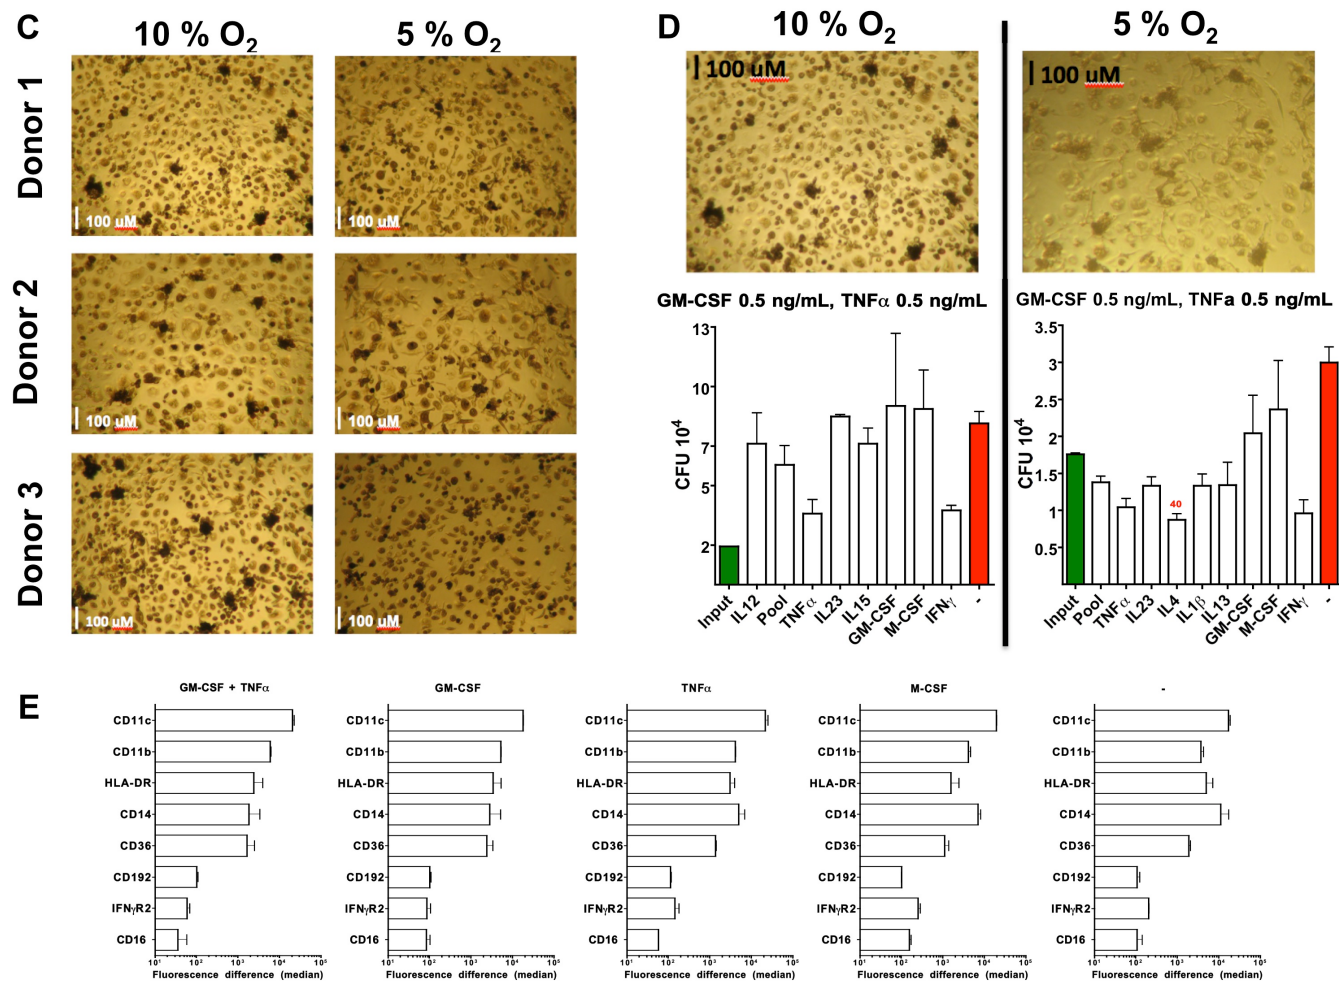

**Supplemental Figure 4. Comparison of 10% and 5% O<sub>2</sub> and different combination of GM-CSF and TNF $\alpha$  during differentiation for control and killing of *M. tuberculosis* by MDM activated with various cytokines.** (A) *CFU for cultures incubated in 10% O<sub>2</sub>*. MDM were differentiated for 14 days with no exogenous cytokines, GM-CSF, TNF- $\alpha$  or with GM-CSF plus TNF- $\alpha$  (0.5 ng/mL for GM-CSF ; 0.5 and 5 for TNF- $\alpha$ ) under 10% O<sub>2</sub>. Cells were activated with the indicated cytokines (50 ng/mL each) on day 14 and infected with *M. tuberculosis* (MOI = 0.1) on day 16. Cells were lysed 2 weeks later to determine CFU. 3 donors are represented (upper, middle and lower panels). (B) *CFU for cultures incubated in 5% O<sub>2</sub>*. Experiments were performed as in (A) except that the O<sub>2</sub> concentration was further reduced. (C) *Morphology of MDM under physiologic O<sub>2</sub> tension*. Cells were prepared as in (A) 10% O<sub>2</sub> and (B) 5% O<sub>2</sub> except that MDM were differentiated with GM-CSF (0.5 ng/mL) plus TNF- $\alpha$  (0.5 ng/mL) for the first 14 days and then activated with TNF- $\alpha$  (50 ng/mL). Micrographs were taken 14 days after infection in experiments with cells from three donors. Scale bar indicates 100  $\mu$ m. (D) *Comparison of the control of *M. tuberculosis* under 5% and 10% O<sub>2</sub>*. Cells were prepared as in (A) and (B) except that MDM were differentiated with GM-CSF (0.5 ng/mL) plus TNF- $\alpha$  (0.5 ng/mL) for the first 14 days and then activated with various cytokines (50 ng/mL) or with IFN $\gamma$ . Micrographs from TNF- $\alpha$  activation were taken 14 days after infection to illustrate the cells' integrity. Scale bar indicates 100  $\mu$ m. (E) **Markers expressed by MDM**. MDM were differentiated in 40% human plasma for 14 days with GM-CSF (0.5 ng/mL) plus TNF- $\alpha$  (0.5 ng/mL), GM-CSF (0.5 ng/mL), TNF- $\alpha$  (0.5 ng/mL), M-CSF (50 ng/mL) or without cytokines under 5% O<sub>2</sub>. Cells were analyzed by flow cytometry. Results are means for cells from two different donors.

Supplemental Figure 5

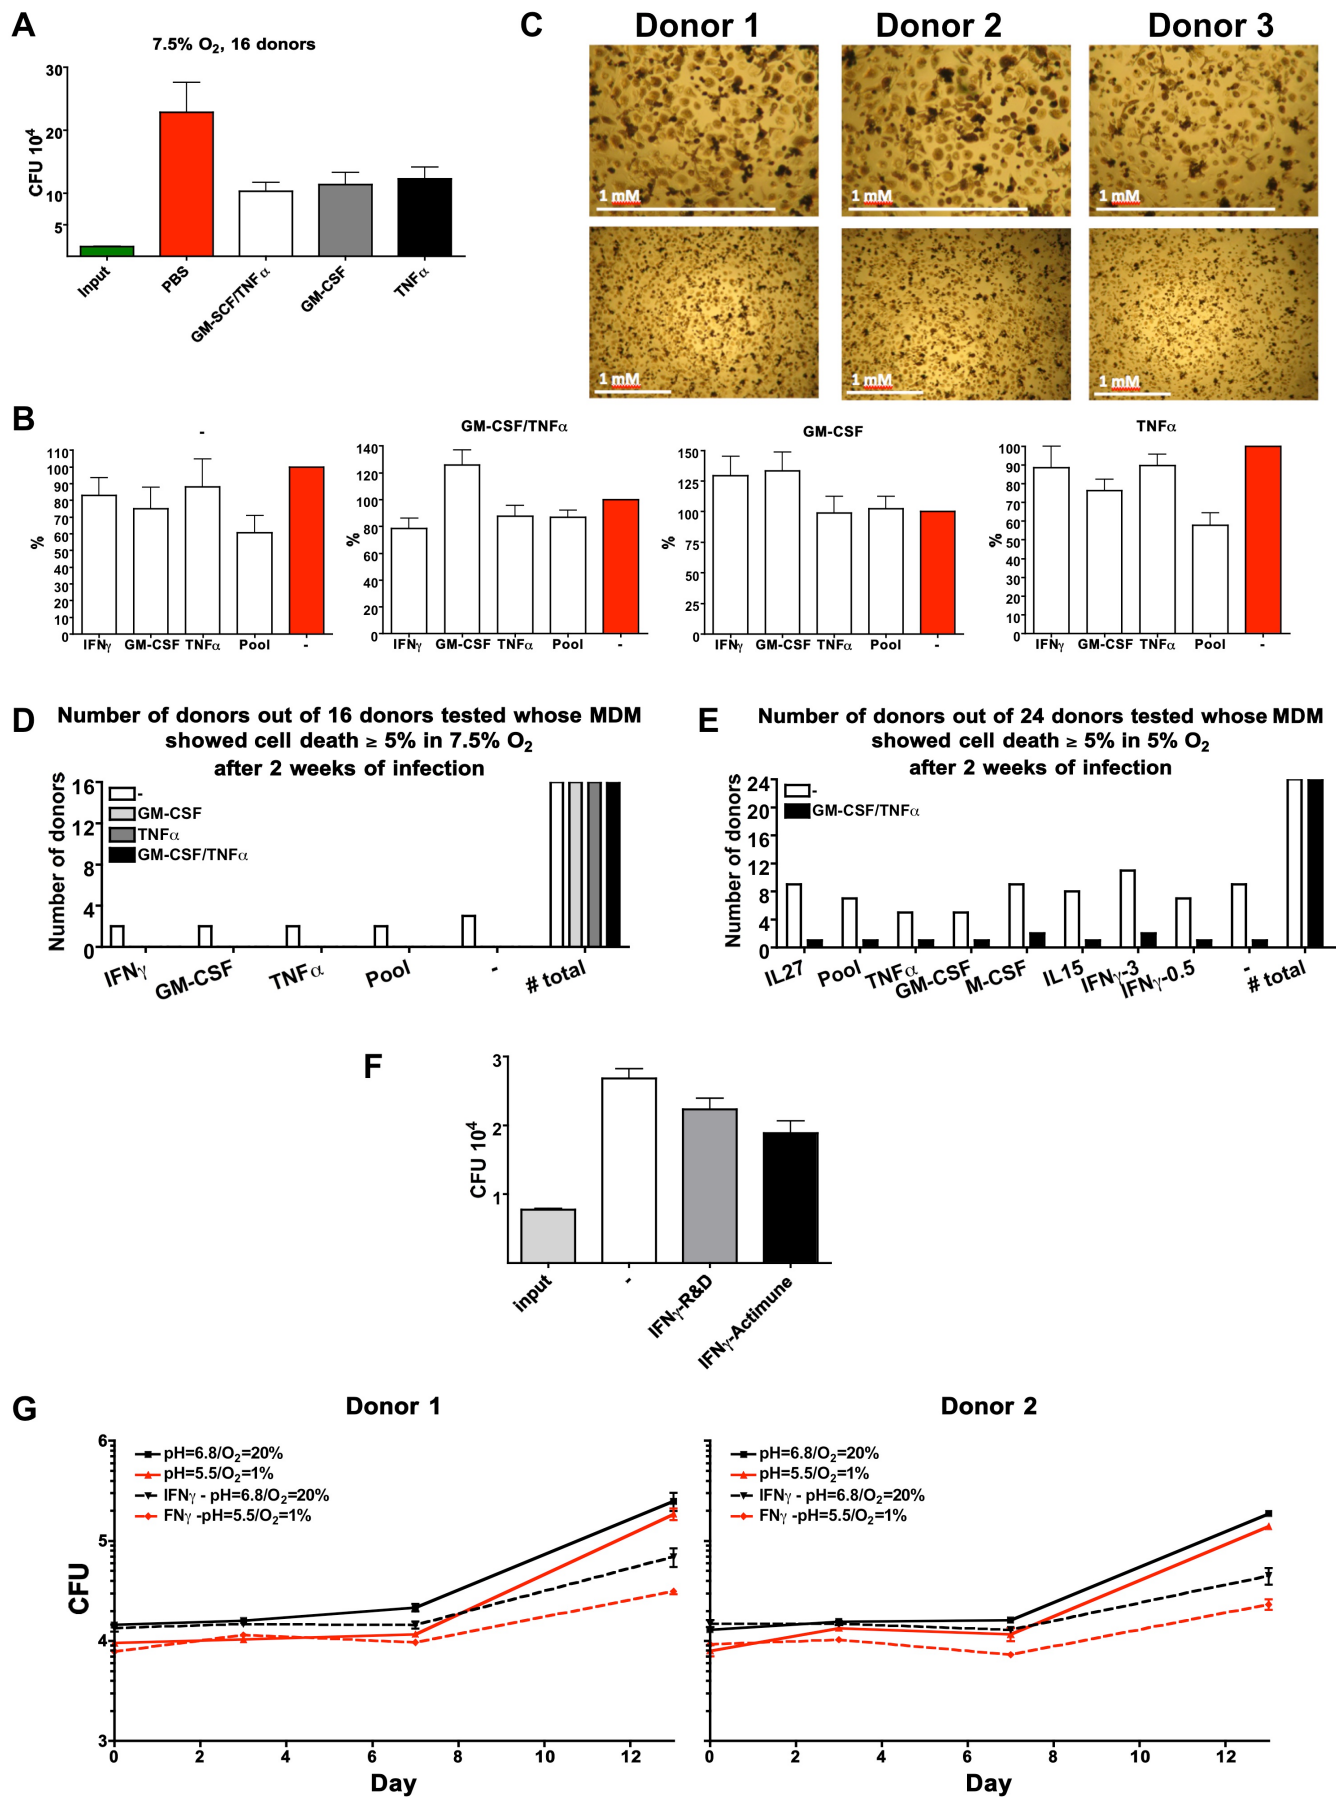

## Supplemental Figure 5

H

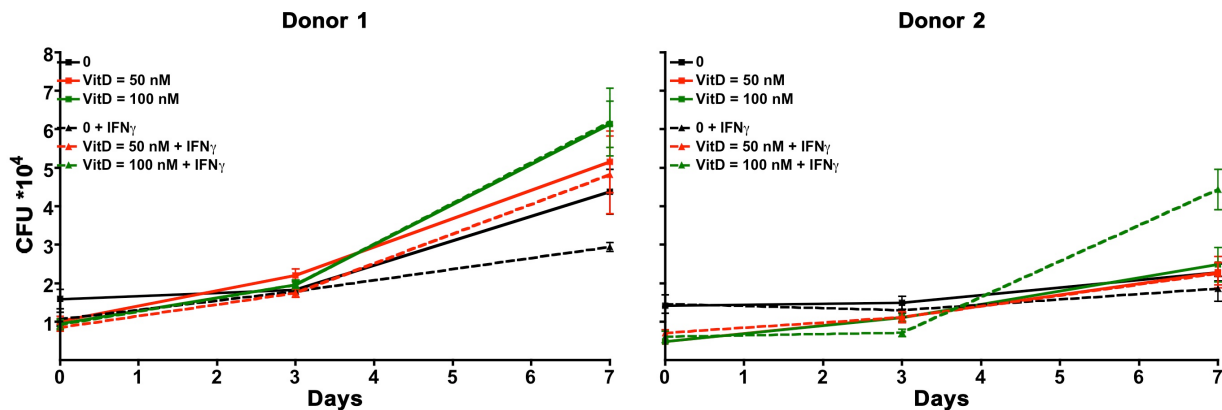

I

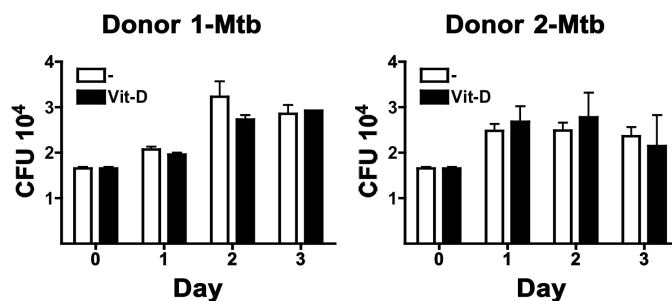

J

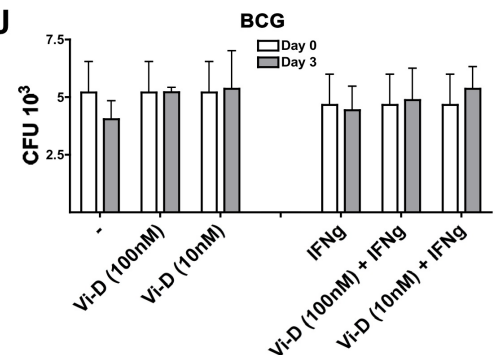

**Supplemental Figure 5. Reproducibility of control of *M. tuberculosis* replication by MDM differentiated with different combinations of GM-CSF and TNF $\alpha$  and activated with various cytokines in physiologic levels of O $_2$ .** (A) Reproducible control of *M. tuberculosis* with appropriately differentiated MDM that were activated with IFN $\gamma$  in 7.5% O $_2$ . MDM from 16 donors were differentiated in 7.5% O $_2$  with no cytokines, GM-CSF, TNF- $\alpha$  or GM-CSF plus TNF- $\alpha$  (0.5 ng/mL each) for 14 days and infected with *M. tuberculosis* on day 16 (MOI = 0.19). Cells were lysed 2 weeks later to determine CFU. (B) Comparison of IFN $\gamma$  and other cytokines during the activation period at 7.5% O $_2$ . In the same experiments illustrated in (A), MDM were also activated with the indicated cytokines, each at 50 ng/mL except for IFN $\gamma$  (3 ng/mL). CFU counts from cultures lysed 2 weeks after infection are presented as a percent of those for MDM given PBS instead of exogenous cytokines during the activation period. (c) Morphology of MDM under physiologic O $_2$  tension. Cells were prepared as in

(A) except that MDM were differentiated under 5% O<sub>2</sub>. MDM were activated with TNF- $\alpha$  (50 ng/mL) on day 14 and infected with *M. tuberculosis* (MOI = 0.1) on day 16. Micrographs were taken 14 days after infection in experiments with cells from three donors. Scale bar indicates 1 mm (*sic*). (D) Number of donors (out of 16 tested) whose MDM underwent at least 5% cell death after two weeks of infection with *M. tuberculosis*, depending on the cytokines used for differentiation as shown in the inset and the cytokines used for activation as shown on the X-axis, both in 7.5% O<sub>2</sub>. Conditions were otherwise as in (A) and (B). (E) As in (D) but testing MDM from 24 donors in 5% O<sub>2</sub>. (F) Impact of different sources of IFN $\gamma$ . MDM differentiated with RPMI-40% human plasma (no added cytokines) for 14 days were treated or not on day 14 with IFN $\gamma$  from R&D or with the approved biologic “Actimmune” and infected with BCG on day 16. Cells were lysed 3 weeks later to determine CFU. Means  $\pm$  SD from 24 replicate wells for each condition in one experiment representative of 2 experiments each with a different donor. “P” refers to P-values from Student’s t test, as compared with corresponding control. (G) CFU for cultures infected in 5% O<sub>2</sub> with *M. tuberculosis* prepared by growth either at pH 6.8 under 20 % O<sub>2</sub> or at pH 5.5 under 1 % O<sub>2</sub>. MDM were differentiated for 14 days with GM-CSF plus TNF- $\alpha$  (0.5 ng/mL each) under 5% O<sub>2</sub>. Cells were activated or not with IFN $\gamma$  on day 14 and infected with *M. tuberculosis* (MOI = 0.2) on day 16 using *M. tuberculosis* prepared by two weeks of growth under two different conditions. MDM were lysed 0, 3 and 7 days later to determine CFU. Results are from 3 donors (upper, middle and lower panels). (H) CFU for MDM differentiated with or without 1,25 dihydroxyvitamin D in 5% O<sub>2</sub>. MDM were differentiated in 10% FBS for 14 days with GM-CSF plus TNF- $\alpha$  (0.5 ng/mL each) with or without vitamin D (50 nM or 100 nM) under 5% O<sub>2</sub>. Cells were activated with IFN $\gamma$  on day 14 and infected with *M. tuberculosis* (MOI = 0.2) on day 16. Cells were lysed 0, 3 and 7 days later. Cellular destruction was observed after 7 days due to the culture in FBS. Results from 2 donors are represented. (I) CFU for MDM activated with or without Vitamin D in 10% O<sub>2</sub>. MDM were differentiated in RPMI and 40% human plasma for 14 days with GM-CSF plus TNF- $\alpha$  (0.5 ng/mL each) under 5% O<sub>2</sub>. Cells were activated with or without vitamin D (100 nM) on day 14 and infected with *M. tuberculosis* (MOI =

0.2) on day 16. Cells were lysed at different time points (day 0,1, 2 and 3). 2 donors are represented. **(J)**

As in **(I)**, but using BCG instead of *M. tuberculosis*.
